# Supplementary material for: Gender-Dependent Differences in Plasma Matrix Metalloproteinase-8 Elevated in Pulmonary Tuberculosis
Source: PLOS journal article supplement (doi:10.1371/journal.pone.0117605), 2015-01-30
Supplement: S1 (10.1371/journal.pone.0117605.s001) [file journal.pone.0117605.s001]

|        |        | All                   | Healthy                | Symptomatic            | TB                     |
|--------|--------|-----------------------|------------------------|------------------------|------------------------|
| MMP-1  | Male   | 204 (9- 540)          | 7 (4-84)               | 344 (81-635)           | 287 (83-598)           |
|        | Female | 83 (9-317)            | 10 (6-94)              | 202 (36-467)           | 178 (29-594)           |
| MMP-3  | Male   | 10134 (7302-14111)    | 10603 (7063 - 14968)   | 10725 (7836 - 14327)   | 9640 (7181 - 13789)    |
|        | Female | 4848 (3352 - 6774)    | 5177 (3344 - 7517)     | 4978 (3440 - 6774)     | 4702 (3273 - 6508)     |
| MMP-7  | Male   | 34 (20 – 116)         | N/A                    | N/A                    | N/A                    |
|        | Female | 3 (19 – 108)          |                        |                        |                        |
| MMP-8  | Male   | 6277 (3201 - 12381)   | 3413 (2409 - 6368)     | 4069 (2363 - 6889)     | 10622 (5381 - 17359)   |
|        | Female | 4094 (2214 - 7725)    | 3125 (2040 - 6427)     | 3374 (2021 - 5722)     | 7043 (3909 - 13404)    |
| MMP-9  | Male   | 75150 (50272- 111266) | 64786 (48935 - 107322) | 77247 (46492 - 109487) | 80411 (53645 - 117600) |
|        | Female | 55631 (38356 - 92406) | 52659 (34556 - 82052)  | 53285 (35007 - 88313)  | 63861 (42572 - 108639) |
| MMP-10 | Male   | 543 (376 – 788)       | N/A                    | N/A                    | N/A                    |
|        | Female | 526 (364 – 764)       |                        |                        |                        |

**Table A. Plasma MMP concentrations are higher in men than women.** Median levels and interquartile ranges (in brackets) for plasma matrix metalloproteinases (MMPs) analysed separately according to gender, for the entire cohort and separately by patient groups. Abbreviations: N/A – Not analysed.

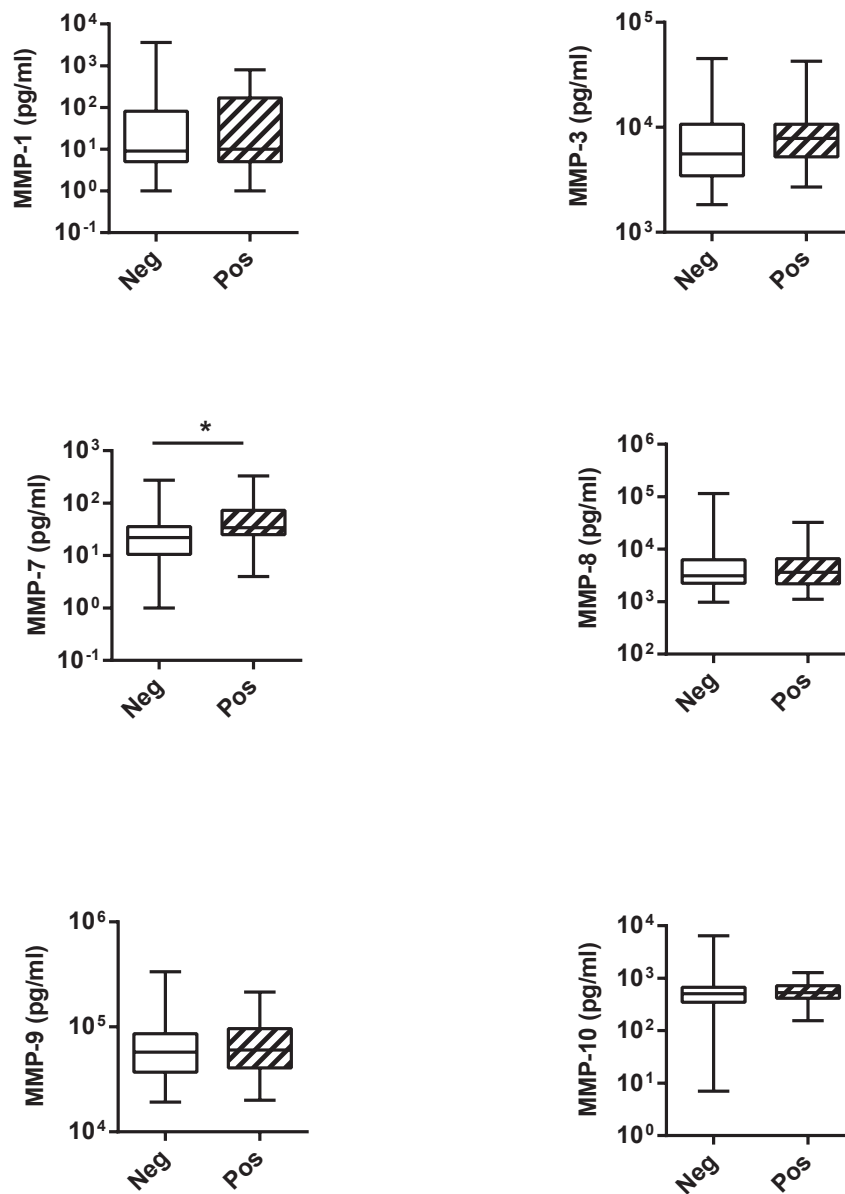

**Figure A. Plasma MMP-7 concentrations are higher in healthy controls with a positive IGRA than those with a negative IGRA.** Plasma MMP concentrations analyzed by luminex array were compared by unpaired t-test. MMP-7 concentrations were significantly higher in individuals with a positive IGRA than a negative IGRA.

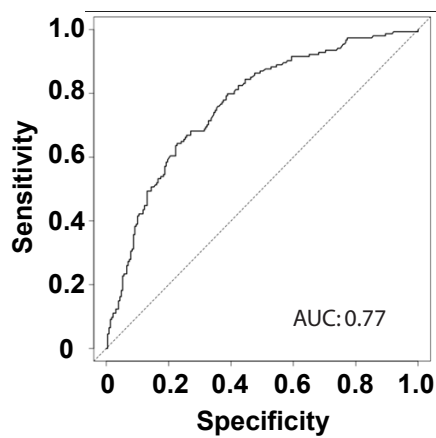

**Figure B. Plasma MMP-8 may discriminate patients with active pulmonary tuberculosis (TB) from symptomatic controls.** A receiver operating characteristic (ROC) curve was plotted to investigate whether plasma MMP-8 concentrations discriminated between active pulmonary TB and respiratory symptomatics. The area under the curve (AUC) was 0.77 indicating moderately high predictive ability. The optimal cut off was MMP-8 = 6600 pg/ml with specificity 77.3% and sensitivity 64.3%.
